# Supplementary material for: Vitamin C Can Shorten the Length of Stay in the ICU: A Meta-Analysis
Source: Nutrients. 2019 Mar 27;11(4):708. doi: 10.3390/nu11040708 (PMC6521194; doi:10.3390/nu11040708)
Supplement: Supplementary file 1 [file nutrients-11-00708-s001.zip › Supplement_S2_Hemila_2019_3_24.xlsx]

## Sheet: Cover
This spreadsheet is Supplementary file S2
for
Vitamin C Can Shorten the Length of Stay in the ICU: A Meta-Analysis
by
Harri Hemilä and Elizabeth Chalker
The main text is published in 2019 in the journal
Nutrients
https://www.mdpi.com/journal/nutrients
Contact Harri Hemilä
harri.hemila@helsinki.fi

## Sheet: ICU
	Calculation of the effect of vitamin C on the length of stay in the ICU by the ratio of means (RoM)
																														SE_pool
				Friedrich (2011) example, ref. [127]								Friedrich (2011) example: checking spreadsheet formulas [127]																		calculated
			213	67	9	177	40	10				1.20339		0.314554	0.0109938	0.225989	0.00510709	0.126889	0.185142	-0.0635606	0.433845	0.938417	1.54318	1.20339						from the
																		SE_pool	Ln_RoM			Correct values in Friedrich paper								published P-value
			Reported ICU stay						Total N													0.94	1.54	1.20
																		in Figures 3 and 4:
	Trial	day/h	Vit C			Placebo												seTE	TE
			mean	SD	N	mean	SD	N	N	Final MA																															sensitivity		cardiac		po	iv		in Iran	Out of Iran
												RoM		vit C		Plac		SE_pool	Ln_RoM	CI_low	CI_hi	Exp_CI_low	Exp_CI_hi	RoM			Z	P(1-tail)	P(2-tail)			studlab	N	TE	seTE	Route	NoDingchao	NoAbdVitE	No3small	sensitivity		cardiac		po			Iran
	Abdoulhossein	d	5.5	1.73	20	5.2	1.67	20	40	40		1.05769		0.314545	0.00494694	0.321154	0.00515699	0.100518	0.0560895	-0.140926	0.253105	0.868553	1.28802	1.05769	Abdoulhossein		0.558002	0.288421	0.576843			Abdoulhossein	40	0.0560895	0.100518	Intravenous	1	1	1	1	40	NA		0		40	1	40
	AbdoulhossVitE	d	3.5	0.5	20	5.2	1.74	20	40			0.673077		0.142857	0.00102041	0.334615	0.00559837	0.0813559	-0.395896	-0.555353	-0.236438	0.57387	0.789435	0.673077	AbdoulhossVitE		-4.86622	5.68765e-07	1.13753e-06			AbdoulhossVitE	40	-0.395896	0.0813559	Intravenous	1	NA	NA	NA		NA		NA			NA
	Alshafey	d	2.78		50	3.58		50	100	100		0.776536						0.119957	-0.252912	-0.488027	-0.0177966	0.613836	0.982361	0.776536	Alshafey		-2.10836	0.0175	0.035	<Published P-value		Alshafey	100	-0.252912	0.119957	Oral	1	1	1	NA		1	100	1	100		0		100
	Amini	d	2.36	0.865	67	2.329	0.847	71	138	138		1.01331		0.366525	0.00200509	0.363675	0.00186281	0.0621925	0.0132226	-0.108675	0.13512	0.897022	1.14467	1.01331	Amini		0.212608	0.415816	0.831633			Amini	138	0.0132226	0.0621925	Oral	1	1	1	1	138	1	138	1	138		1	138
	Antonic	d	1.5	1.06	52	1.3	0.69	53	105	105		1.15385		0.706667	0.00960342	0.530769	0.0053154	0.122143	0.143101	-0.0962987	0.3825	0.908193	1.46595	1.15385	Antonic		1.17159	0.120681	0.241362			Antonic	105	0.143101	0.122143	Intravenous	1	1	1	1	105	1	105	0		105	0		105
	Bjordahl	d	3.7	2.2	89	4.3	2.9	96	185	185		0.860465		0.594595	0.00397239	0.674419	0.00473792	0.0933291	-0.150282	-0.333207	0.0326427	0.716622	1.03318	0.860465	Bjordahl		-1.61024	0.0536727	0.107345			Bjordahl	185	-0.150282	0.0933291	Oral	1	1	1	1	185	1	185	1	185		0		185
	Colby	h	106.4	249.9	13	48.9	43.2	11	24			2.17587		2.34868	0.424332	0.883436	0.0709508	0.703763	0.777428	-0.601948	2.1568	0.547744	8.64347	2.17587	Colby		1.10467	0.865349	0.269301			Colby	24	0.777428	0.703763	Oral	1	1	NA	NA		NA		NA			NA
	Dehghani	d	1.79	0.313	50	2.1	0.61	50	100	100		0.852381						0.051686	-0.159722	-0.261026	-0.0584172	0.770261	0.943256	0.852381	Dehghani		-3.09023	0.001	0.002	<Published P-value		Dehghani	100	-0.159722	0.051686	Oral	1	1	1	1	100	1	100	1	100		1	100
	Dingchao	h	25	4.7	45	45	8.5	40	85			0.555556		0.188	0.000785422	0.188889	0.000891975	0.040956	-0.587787	-0.668061	-0.507513	0.512702	0.601991	0.555556	Dingchao		-14.3516	5.20188e-47	1.04038e-46			Dingchao	85	-0.587787	0.040956	Intravenous	0	NA	NA	NA		NA		NA			NA
	Donovan	d	2	1.3	150	1.9	1.5	154	304	304		1.05263		0.65	0.00281667	0.789474	0.0040472	0.0828485	0.0512933	-0.11109	0.213676	0.894859	1.23822	1.05263	Donovan		0.619122	0.732082	0.535836			Donovan	304	0.0512933	0.0828485	Oral	1	1	1	1	304	1	304	1	304		0		304
	Ebade	h	69.3	9	20	76.2	11.6	20	40	40		0.909449						0.034543	-0.0949166	-0.162621	-0.0272123	0.849913	0.973155	0.909449	Ebade		-2.74778	0.003	0.006	<Published P-value		Ebade	40	-0.0949166	0.034543	Intravenous	1	1	1	NA		1	40	0		40	0		40
	Eslami	d	2.3	1.6	50	2.6	1.48	50	100	100		0.884615						0.0999588	-0.122602	-0.318522	0.073317	0.727223	1.07607	0.884615	Eslami		-1.22653	0.11	0.22	<Published P-value		Eslami	100	-0.122602	0.0999588	Oral	1	1	1	1	100	1	100	1	100		1	100
	Fowler	d	8.6	6	16	11	6	8	24		Imputation by SD = range/4	0.781818		0.697674	0.0304218	0.545455	0.0371901	0.260023	-0.246133	-0.755778	0.263512	0.469645	1.30149	0.781818	Fowler		-0.946582	0.171926	0.343852			Fowler	24	-0.246133	0.260023	Intravenous	1	1	NA	NA		NA		NA			NA
	Mirmohammad	h	50.41		160	52.55		154	314	314		0.959277						0.0483652	-0.0415755	-0.136371	0.0532202	0.872519	1.05466	0.959277	Mirmohammad		-0.859617	0.195	0.39	<Published P-value		Mirmohammad	314	-0.0415755	0.0483652	Intravenous	1	1	1	NA		1	314	0		314	1	314
	Papoulidis	d	1.6		85	2.1		85	170	170		0.761905						0.138744	-0.271934	-0.543872	4.99694e-06	0.580496	1	0.761905	Papoulidis		-1.95996	0.025	0.05	<Published P-value		Papoulidis	170	-0.271934	0.138744	Intravenous	1	1	1	1	170	1	170	0		170	0		170
	Sarzaeem	d	2.5	1.4	85	3	1.6	85	170	170		0.833333		0.56	0.00368941	0.533333	0.00334641	0.0838798	-0.182322	-0.346726	-0.0179172	0.706999	0.982242	0.833333	Sarzaeem		-2.17361	0.0148674	0.0297348			Sarzaeem	170	-0.182322	0.0838798	Intravenous	1	1	1	1	170	1	170	0		170	1	170
	Zabet	d	21.45	10.23	14	20.57	13.04	14	28			1.04278		0.476923	0.0162468	0.633933	0.0287051	0.212019	0.0418909	-0.373666	0.457447	0.688207	1.58004	1.04278	Zabet		0.197581	0.578314	0.843373			Zabet	28	0.0418909	0.212019	Intravenous	1	1	NA	NA		NA		NA			NA
	17				986			981	1967	1766																	1.96	0.0249979	0.0499958			Total	1967
										Final MA																	0	0.5	1			Exclusion1	1882			Trials	16	15	12	9		11		6			6
																																Exclusion2	1842			Participants					1312		1726		927	839		862	904
					37	Tanaka (only ventilation, not ICU stay)																										Final meta-analysis	1766
				Total all studies (with Tanaka)	2004
																																													1766			1766
	Calculation of P-value from the SD-values
	For skewed data, the Mann-Whitney test P-values are more appropriate and are used to estimate the SE above. These calculations are shown for comparison.
	Dehghani(days)		1.79	0.313	50	2.1	0.61	50				0.852381		0.17486	0.000611523	0.290476	0.00168753	0.0479484	-0.159722	-0.253701	-0.0657428	0.775924	0.936372	0.852381	Dehghani(days)		-3.33112	0.000432494	0.000864987	Calculated from SD-values
	Ebade		69.3	9	20	76.2	11.6	20				0.909449		0.12987	0.000843313	0.152231	0.00115871	0.044744	-0.0949166	-0.182615	-0.00721831	0.833089	0.992808	0.909449	Ebade		-2.12132	0.0169472	0.0338945	Calculated from SD-values
	Eslami		2.3	1.6	50	2.6	1.48	50				0.884615		0.695652	0.00967864	0.569231	0.00648047	0.127118	-0.122602	-0.371755	0.12655	0.689523	1.13491	0.884615	Eslami		-0.964473	0.167404	0.334809	Calculated from SD-values
	Mirmohammad		50.41	22.07	160	52.55	22	154				0.959277		0.43781	0.00119798	0.418649	0.0011381	0.048333	-0.0415755	-0.136308	0.0531572	0.872574	1.0546	0.959277	Mirmohammad		-0.860189	0.194842	0.389685	Calculated from SD-values
	Papoulidis(days)		1.6	0.9	85	2.1	1.1	85				0.761905		0.5625	0.00372243	0.52381	0.00322796	0.083369	-0.271934	-0.435337	-0.108531	0.647047	0.897151	0.761905	Papoulidis(days)		-3.26181	0.000553517	0.00110703	Calculated from SD-values
	Alshafey study was particularley poorly reported, and we were unable to get contact to the authors, although we sent emails to all 4 author addresses listed on the cover
	Alshafey reported the following means and SDs, but they would lead to P = 0.0006 for the comparison of the groups
	Alshafey repored P = 0.035 for the comparison and we do not see any explanation for the divergence in the P-values.
	To be conservative, we used the larger P-value reported by Alshafey in our calculation of then Log(SE(RoM)), see above
	In sensitivity analysis we excluded the Alshafey study
	Alshafey		2.78	1.33	50	3.58	0.73	50				0.776536		0.478417	0.00457766	0.203911	0.000831591	0.0735476	-0.252912	-0.397065	-0.108759	0.67229	0.896947	0.776536	Alshafey		-3.43875	0.000292203	0.000584407	Calculated from SD-values
[truncated: 5 more columns]

## Sheet: ICU_toR
studlab	TE	seTE	Route	NoDingchao	NoAbdVitE	No3small	sensitivity	cardiac	po	Iran	days3	icudur
Dingchao	-0.587787	0.040956	Intravenous	0	NA	NA	NA	NA	NA	NA	NA	NA
AbdoulhossVitE	-0.395896	0.0813559	Intravenous	1	NA	NA	NA	NA	NA	NA	NA	NA
Papoulidis	-0.271934	0.138744	Intravenous	1	1	1	1	1	0	0	0	2.1
Alshafey	-0.252912	0.119957	Oral	1	1	1	NA	1	1	0	1	3.58
Fowler	-0.246133	0.260023	Intravenous	1	1	NA	NA	NA	NA	NA	NA	NA
Sarzaeem	-0.182322	0.0838798	Intravenous	1	1	1	1	1	0	1	1	3
Dehghani	-0.159722	0.051686	Oral	1	1	1	1	1	1	1	0	2.1
Bjordahl	-0.150282	0.0933291	Oral	1	1	1	1	1	1	0	1	4.3
Eslami	-0.122602	0.0999588	Oral	1	1	1	1	1	1	1	0	2.6
Ebade	-0.0949166	0.034543	Intravenous	1	1	1	NA	1	0	0	1	3.175
Mirmohammad	-0.0415755	0.0483652	Intravenous	1	1	1	NA	1	0	1	0	2.18958
Amini	0.0132226	0.0621925	Oral	1	1	1	1	1	1	1	0	2.329
Zabet	0.0418909	0.212019	Intravenous	1	1	NA	NA	NA	NA	NA	NA	NA
Donovan	0.0512933	0.0828485	Oral	1	1	1	1	1	1	0	0	1.9
Abdoulhossein	0.0560895	0.100518	Intravenous	1	1	1	1	NA	0	1	1	5.2
Antonic	0.143101	0.122143	Intravenous	1	1	1	1	1	0	0	0	1.3
Colby	0.777428	0.703763	Oral	1	1	NA	NA	NA	NA	NA	NA	NA

## Sheet: ICU Characteristics
	Data for Table 1									Vitamin C administration		Control group duration
Year	Study (ref)	Country	Settings	Age (y)	N	No. part, not cardio	Males	Males	Route	Dose (g/d)	Duration at ICU (d)	ICU stay (d)	Ventilation (h)	ICU		Ventilation
2018	Abdoulhossein 2018a no VitE [122]	Iran	Lung contusion	40	40	40	26	0.65	iv	0.5	2	5.2		5.2				Abdoulhossein 2018a no VitE [122]
2018	Abdoulhossein 2018b yes VitE [122]	Iran	Lung contusion	40	40	40	28	0.7	iv	0.5	2	5.2		5.2				Abdoulhossein 2018b yes VitE [122]
2017	Alsfahey 2017 [118]	Egypt	Cardiac	55	100		57	0.57	po	2	1	3.58		3.58		24 hr limit		Alsfahey 2017 [118]
2018	Amini 2018 [120]	Iran	Cardiac	60	138		87	0.630435	po	3	2	2.329	6.68	2.329	d	6.68	h	Amini 2018 [120]
2017	Antonic 2017 [119]	Slovenia	Cardiac	64	105		82	0.780952	iv	2	5	1.3		1.3	d			Antonic 2017 [119]
2012	Bjordahl 2012 [111]	USA	Cardiac	63	185		124	0.67027	po	2	5	4.3	33.6	4.3	d	1.4	d	Bjordahl 2012 [111]
2011	Colby 2011 [109]	USA	Cardiac	65	24		19	0.791667	po	1	5	2.0375		48.9	hours			Colby 2011 [109]
2014	Dehghani 2014 [113]	Iran	Cardiac	61	100		74	0.74	po	1	5	2.1	15.41	2.1	d	15.41	h	Dehghani 2014 [113]
1994	Dingchao 1994 [106]	China	Cardiac	?	85		?	?	iv	17*	1	1.875		45	hours			Dingchao 1994 [106]
2012	Donovan 2012 [112]	USA	Cardiac	65	304		230	0.756579	po	2	5	1.9		1.9				Donovan 2012 [112]
2014	Ebade 2014 [114]	Egypt	Cardiac	55	40		29	0.725	iv	3	5	3.175	2.04	76.2	hours	2.04	h	Ebade 2014 [114]
2007	Eslami 2007 [108]	Iran	Cardiac	60	100		67	0.67	po	2	5	2.6		2.6	d			Eslami 2007 [108]
2014	Fowler 2014 [115]	USA	Sepsis	?	24	24	?	?	iv	3.5-14*	4	11		11	d?			Fowler 2014 [115]
2018	Mirmohammadsadeghi 2018 [121]	Iran	Cardiac	62	314		244	0.77707	iv	1	4	2.18958		52.55	hours			Mirmohammadsadeghi 2018 [121]
2011	Papoulidis 2011 [110]	Greece	Cardiac	73	170		120	0.705882	iv	1	5	2.1		2.1	d			Papoulidis 2011 [110]
2014	Sarzaeem 2014 [116]	Iran	Cardiac	59	170		118	0.694118	iv	1	5	3		3	d			Sarzaeem 2014 [116]
2000	Tanaka 2000 [107]	Japan	Burn patients	45	37	37	25	0.675676	iv	110*	1		511.2			21.3	d	Tanaka 2000 [107]
2016	Zabet 2016 [117]	Iran	Sepsis	64	28	28	21	0.75	iv	7*	3	20.57	46.78	20.57	d	46.78	h	Zabet 2016 [117]
										*calculated for 70 kg
	18		Min	40	2004	169	1351	0.57
			Max	73	Cardio:	1835		0.791667
			Median	60.5				0.702941	11	:iv	11	: 4 days or over
									7	:po
				Males reported:	1895		0.712929
							Total male average in studies that reported sex
				Three smallest trials:	76
				For the weight of 70 kg					vit C	vit C
					dose unit	dose	for 70 kg	Times per day	mg/day	g/day
				Dingchao 1994	mg/kg twice	125	8750	2	17500	17.5
				Fowler 2014 Low	mg/kg	50	3500	1	3500	3.5
				High	mg/kg	200	14000	1	14000	14
				Tanaka 2000	mg/kg/hour	66	4620	24	110880	110.88
				Zabet 2016	mg/kg	25	1750	4	7000	7

## Sheet: To Table 1
		Ordered by N to Table 1							Vit C	Vit C	Control	Control
	Year	Study (ref)	Country	Settings	Age (y)	N	Males	Route	Dose (g/d)	Duration at ICU (d)	ICU stay (d)	Ventilation (h)
	2018	Mirmohammadsadeghi 2018 [121]	Iran	Cardiac	62	314	0.77707	iv	1	4	2.18958	0
	2012	Donovan 2012 [112]	USA	Cardiac	65	304	0.756579	po	2	5	1.9	0
	2012	Bjordahl 2012 [111]	USA	Cardiac	63	185	0.67027	po	2	5	4.3	33.6
	2011	Papoulidis 2011 [110]	Greece	Cardiac	73	170	0.705882	iv	1	5	2.1	0
	2014	Sarzaeem 2014 [116]	Iran	Cardiac	59	170	0.694118	iv	1	5	3	0
	2018	Amini 2018 [120]	Iran	Cardiac	60	138	0.630435	po	3	2	2.329	6.68
	2017	Antonic 2017 [119]	Slovenia	Cardiac	64	105	0.780952	iv	2	5	1.3	0
	2017	Alsfahey 2017 [118]	Egypt	Cardiac	55	100	0.57	po	2	1	3.58	0
	2014	Dehghani 2014 [113]	Iran	Cardiac	61	100	0.74	po	1	5	2.1	15.41
	2007	Eslami 2007 [108]	Iran	Cardiac	60	100	0.67	po	2	5	2.6	0
	1994	Dingchao 1994 [106]	China	Cardiac	?	85	?	iv	17*	1	1.875	0
	2018	Abdoulhossein 2018a no VitE [122]	Iran	Lung contusion	40	40	0.65	iv	0.5	2	5.2	0
	2018	Abdoulhossein 2018b yes VitE [122]	Iran	Lung contusion	40	40	0.7	iv	0.5	2	5.2	0
	2014	Ebade 2014 [114]	Egypt	Cardiac	55	40	0.725	iv	3	5	3.175	2.04
	2000	Tanaka 2000 [107]	Japan	Burn patients	45	37	0.675676	iv	110*	1	0	511.2
	2016	Zabet 2016 [117]	Iran	Sepsis	64	28	0.75	iv	7*	3	20.57	46.78
	2011	Colby 2011 [109]	USA	Cardiac	65	24	0.791667	po	1	5	2.0375	0
	2014	Fowler 2014 [115]	USA	Sepsis	?	24	?	iv	3.5-14*	4	11	0

## Sheet: Weighted dose
	Weighted mean vitamin C dose in 6 oral administration studies
	Study	N	Route (iv or po)	Dose (g/d)		Product
	Alsfahey 2017	50	po	2		100
	Amini 2018	67	po	3		201
	Bjordahl 2012	89	po	2		178
	Dehghani 2014	50	po	1		50
	Donovan 2012	150	po	2		300
	Eslami 2007	50	po	2		100
	Sum (N)	456			Sum (Product)	929
					Weighted vitamin C dose	2.03728	g/day

## Sheet: Ventilation
	Calculation of the effect of vitamin C on the length of mechanical ventilation by the ratio of means (RoM)
				Friedrich (2011) example						Friedrich (2011) example																		calculated
			213	67	9	177	40	10		1.20339		0.314554	0.0109938	0.225989	0.00510709	0.126889	0.185142	-0.0635606	0.433845	0.938417	1.54318	1.20339						from the
																												published P-value
			Reported ventilation time
		Day/h	Vit C			Placebo
			mean	SD	N	mean	SD	N
										Ratio of Means		vit C		Plac		SE_pool	Ln_RoM	CI_low	CI_hi	Exp_CI_low	Exp_CI_hi	RoM			Z	P(1-tail)	P(2-tail)
																													studlab	TE	seTE	participants	LongVenti	hours	LogVenti
	Amini	h	7.33	6.02	67	6.68	4.26	71		1.09731		0.821282	0.0100672	0.637725	0.00572806	0.125679	0.0928575	-0.153474	0.339189	0.857723	1.40381	1.09731	Amini		0.738845	0.230001	0.460001		Amini	0.0928575	0.125679	cardiac	<24 hour ventilation	6.68	0.824776
	Bjordahl	d	1.2		89	1.4		96		0.857143						0.0718849	-0.154151	-0.295045	-0.0132563	0.744498	0.986831	0.857143	Bjordahl		-2.14441	0.016	0.032	<Published P-value	Bjordahl	-0.154151	0.0718849	cardiac	>24 hour ventilation	33.6	1.52634
	Dehghani	h	13.38	2.01	50	15.41	14.35	50		0.868267						0.143518	-0.141256								-0.984235	0.1625	0.325	<Published P-value	Dehghani	-0.141256	0.143518	cardiac	<24 hour ventilation	15.41	1.1878
	Ebade	h	2.04	0.35	20	1.99	0.31	20		1.02513		0.171569	0.00147179	0.155779	0.00121335	0.0518184	0.0248152	-0.0767488	0.126379	0.926122	1.13471	1.02513	Ebade		0.478888	0.683991	0.632019		Ebade	0.0248152	0.0518184	cardiac	<24 hour ventilation	1.99	0.298853
	Tanaka	d	12.1	8.8	19	21.3	15.6	18		0.568075		0.727273	0.0278382	0.732394	0.0298001	0.24008	-0.565502	-1.03606	-0.0949454	0.354851	0.909423	0.568075	Tanaka		-2.35547	0.00924954	0.0184991		Tanaka	-0.565502	0.24008	non-cardiac	>24 hour ventilation	511.2	2.70859
	Zabet	h	36.63	16.11	14	46.78	10.11	14		0.783027		0.439803	0.0138162	0.216118	0.00333621	0.130967	-0.244588	-0.501284	0.0121077	0.605752	1.01218	0.783027	Zabet		-1.86755	0.0309123	0.0618246		Zabet	-0.244588	0.130967	non-cardiac	>24 hour ventilation	46.78	1.67006
																									1.96	0.0249979	0.0499958
	6				259			269																	0	0.5	1
				Total	528																				-1.95996	0.025	0.05
	Calculation of P-value from the SD-values
	Bjordahl(h)		1.2	0.8	89	1.4	1	96		0.857143		0.666667	0.00499376	0.714286	0.00531463	0.10153	-0.154151	-0.35315	0.0448485	0.702472	1.04587	0.857143	Bjordahl(h)		-1.51827	0.0644727	0.128945
	Dehghani		13.38	2.01	50	15.41	14.35	50		0.868267		0.150224	0.000451346	0.931213	0.0173432	0.133396	-0.141256	-0.402712	0.120201	0.668505	1.12772	0.868267	Dehghani		-1.05892	0.144818	0.289637		Dehghani	-0.141256	0.133396	cardiac
	Hours
	Tanaka	hour				511.2

## Sheet: V_toR
studlab	TE	seTE	participants	LongVenti	LogVenti
Tanaka	-0.565502	0.24008	non-cardiac	>24 hour ventilation	2.70859
Zabet	-0.244588	0.130967	non-cardiac	>24 hour ventilation	1.67006
Bjordahl	-0.154151	0.0718849	cardiac	>24 hour ventilation	1.52634
Dehghani	-0.141256	0.143518	cardiac	<24 hour ventilation	1.1878
Ebade	0.0248152	0.0518184	cardiac	<24 hour ventilation	0.298853
Amini	0.0928575	0.125679	cardiac	<24 hour ventilation	0.824776

## Sheet: P-calculations
	Calculations of P-values for vitamin C and ICU meta-analysis
	Z	P(1-tail)		P(2-tail)
	1.96	0.0249979		0.0499958
	5.2	9.96443e-08		1.99289e-07	1.99289e-07	All but Dingchao	Exclusion1
	4.2	1.33457e-05		2.66915e-05	2.66915e-05	All but Dingchao and Abdoulhossein vit E trials	Exclusion2
	4.21	1.27685e-05		2.55371e-05	2.55371e-05	Also 3 small studies excluded	Final meta-analysis
	4.4	5.41254e-06		1.08251e-05	1.08251e-05		Cardiac
Z	Chi-2		DF	P(2-tail)
	3.84	testing	1	0.0500435
1.96	3.8416	calculations	1	0.0499958
	149.449		100	0.00100005
	154.6		16	9.64918e-25		All 17 studies test of heterogeneity
10.67	113.849		1	1.40626e-26		All 17 studies test of effect
5.19	26.9361		1	2.10294e-07		All but Dingchao
4.19	17.5561		1	2.78954e-05		All but Dingchao and Abdoulhossein vit E trials

## Sheet: Abdoul 2x2 analysis
Generation of the distributions of the 4 groups
		Duration is based on the mean and sd of the group and the random P-value on the left
						Duration:final values
Group	Random	Duration	Intended	Calculated		days	vitC	vitE	Calculated		Overall			Diff	Diff^2	SS
Control	0.11	3.1517	5.2	4.81501	mean	3.53669	0	0	5.2		mean	4.85		-1.31331	1.72479	221.929
	0.59	8.4275	1.67	1.67	sd	8.81249	0	0	1.67		sd	1.66557		3.96249	15.7013
	0.15	3.46916				3.85415	0	0			var	2.77411		-0.995854	0.991725
	0.22	3.91044				4.29543	0	0			N	80		-0.554573	0.307551
	0.61	5.66646				6.05145	0	0			SS	221.929		1.20145	1.44349
	0.65	5.84349				6.22847	0	0						1.37847	1.90019
	0.35	4.55651				4.9415	0	0						0.0915045	0.00837307
	0.83	6.79346				7.17845	0	0						2.32845	5.42166
	0.3	4.32425				4.70924	0	0						-0.140759	0.0198132
	0.2	3.79449				4.17948	0	0						-0.670518	0.449594
	0.33	4.46535				4.85033	0	0						0.000334677	1.12009e-07
	0.09	2.96094				3.34593	0	0						-1.50407	2.26223
	0.23	3.96613				4.35112	0	0						-0.498885	0.248886
	0.38	4.68985				5.07484	0	0						0.224837	0.0505516
	0.03	2.05907				2.44406	0	0						-2.40594	5.78853
	0.71	6.12415				6.50914	0	0						1.65914	2.75275
	0.07	2.73543				3.12042	0	0						-1.72958	2.99145
	0.64	5.79863				6.18362	0	0						1.33362	1.77853
	0.71	6.12415				6.50914	0	0						1.65914	2.75275
	0.91	7.43906				7.82405	0	0						2.97405	8.84498
									Calculated
vitamin C	0.07	2.94688	5.5	5.37277	mean	3.07411	1	0	5.5					-1.77589	3.15378
	0.57	5.80513	1.73	1.73	sd	5.93236	1	0	1.73					1.08236	1.1715
	0.99	8.0245				8.15173	1	0						3.30173	10.9014
	0.27	4.43983				4.56706	1	0						-0.282937	0.0800534
	0.31	4.64218				4.76941	1	0						-0.0805917	0.00649502
	0.31	4.64218				4.76941	1	0						-0.0805917	0.00649502
	0.52	5.58677				5.714	1	0						0.863995	0.746488
	0.28	4.49168				4.61891	1	0						-0.231086	0.0534009
	0.92	7.93077				8.058	1	0						3.208	10.2913
	0.67	6.26105				6.38828	1	0						1.53828	2.3663
	0.38	4.97152				5.09875	1	0						0.248748	0.0618754
	0.01	1.47542				1.60265	1	0						-3.24735	10.5453
	0.45	5.28261				5.40984	1	0						0.559835	0.313416
	0.68	6.30912				6.43635	1	0						1.58635	2.5165
	0.4	5.06171				5.18894	1	0						0.338939	0.11488
	0.9	7.71708				7.84431	1	0						2.99431	8.96591
	0.06	2.81024				2.93747	1	0						-1.91253	3.65777
	0.74	6.61299				6.74022	1	0						1.89022	3.57292
	0.42	5.15072				5.27795	1	0						0.427954	0.183144
	0.85	7.29303				7.42026	1	0						2.57026	6.60623
									Calculated
vitamin E	0.24	3.97103	5.2	5.01113	mean	4.1599	0	1	5.2					-0.690096	0.476233
	0.32	4.3862	1.74	1.74	sd	4.57507	0	1	1.74					-0.274926	0.075584
	0.11	3.06584				3.25471	0	1						-1.59529	2.54495
	0.03	2.30345				2.49232	0	1						-2.35768	5.55865
	0.41	4.80407				4.99294	0	1						0.142942	0.0204325
	0.99	7.6				7.78887	0	1						2.93887	8.63696
	0.08	2.75518				2.94405	0	1						-1.90595	3.63266
	0.36	4.57628				4.76515	0	1						-0.0848479	0.00719917
	0.07	2.63212				2.82099	0	1						-2.02901	4.11687
	0.96	8.24619				8.43506	0	1						3.58506	12.8527
	0.24	3.97103				4.1599	0	1						-0.690096	0.476233
	0.49	5.15638				5.34525	0	1						0.49525	0.245273
	0.57	5.50689				5.69576	0	1						0.845761	0.715312
	0.54	5.37475				5.56363	0	1						0.713625	0.509261
	0.89	7.33416				7.52303	0	1						2.67303	7.14509
	0.38	4.66846				4.85733	0	1						0.00733381	5.37848e-05
	0.72	6.21414				6.40301	0	1						1.55301	2.41185
	0.93	7.76788				7.95675	0	1						3.10675	9.65188
	0.31	4.33722				4.52609	0	1						-0.323909	0.104917
	0.58	5.55129				5.74017	0	1						0.890165	0.792394
									Calculated
vitamin C+E	0.14	2.95984	3.5	3.36661	mean	3.09323	1	1	3.5					-1.75677	3.08625
	0.18	3.04232	0.5	0.500004	sd	3.17571	1	1	0.500004					-1.67429	2.80326
	0.35	3.30734				3.44073	1	1						-1.40927	1.98605
	0.73	4.4266				4.55999	1	1						-0.290012	0.084107
	0.48	3.47492				3.60831	1	1						-1.24169	1.54179
	0.38	3.34726				3.48065	1	1						-1.36935	1.87513
	0.92	4.20254				4.33592	1	1						-0.514076	0.264275
	0.28	3.20858				3.34197	1	1						-1.50803	2.27416
	0.34	3.29377				3.42716	1	1						-1.42284	2.02448
	0.46	3.44978				3.58317	1	1						-1.26683	1.60486
	0.16	3.00277				3.13616	1	1						-1.71384	2.93725
	0.59	3.61377				3.74716	1	1						-1.10284	1.21626
	0.61	3.63966				3.77305	1	1						-1.07695	1.15983
	0.01	2.33683				2.47021	1	1						-2.37979	5.66338
	0.67	3.71996				3.85334	1	1						-0.996656	0.993322
	0.58	3.60095				3.73433	1	1						-1.11567	1.24471
	0.05	2.67757				2.81096	1	1						-2.03904	4.15768
	0.22	3.1139				3.24729	1	1						-1.60271	2.56868
	0.83	3.97708				4.11047	1	1						-0.73953	0.546904
	0.13	2.9368				3.07019	1	1						-1.77981	3.16772

[truncated: 3 more sheets: Abdoul 2x2_toR, Abdoul ANOVA, Searches 2019-1-20]
